# Supplementary material for: Targeting gut microbiota-derived butyrate improves hepatic gluconeogenesis through the cAMP-PKA-GCN5 pathway in late pregnant sows
Source: Royal Society of Chemistry journal article supplement (doi:10.1039/d2fo00094f), 2022-01-01
Supplement: d2fo00094f1.pdf [file d2fo00094f1.pdf]

1 **Table S1.** Ingredient and chemical composition of the gestation diets

| Ingredients            | Content, % | Nutrients              | Nutrient level |
|------------------------|------------|------------------------|----------------|
| Corn                   | 67.0       | Calculated composition |                |
| Soybean meal, dehulled | 14.0       | GE, MJ/kg              | 13.28          |
| Wheat bran             | 15.4       | DM, %                  | 88.6           |
| Fish meal              | 0.6        | CP, %                  | 13.6           |
| Soybean oil            | -          | Ca, %                  | 0.95           |
| Dicalcium phosphate    | 1.2        | Total P, %             | 0.61           |
| Limestone              | 0.9        | Analyzed composition   |                |
| L-Lysine HCl (78%)     | -          | DM, %                  | 87.4           |
| Salt                   | 0.38       | CP, %                  | 12.4           |
| Premix <sup>1</sup>    | 0.52       | Ash, %                 | 5.3            |
| Total                  | 100        | EE, %                  | 1.8            |

2 <sup>1</sup>Premix supplied the following per kilogram of diet: Zn, 90.31 mg as Zn oxide; Mn, 18.01 mg as Mn  
3 sulfate; Fe, 53.96 mg as ferrous sulfate; Cu, 5.40 mg as Cu sulfate; Se, 0.30 mg as Na selenite; I, 2.20  
4 mg as K iodate; niacin, 55.07 mg; pantothenic acid, 33.04 mg; vitamin A, 11,013 IU; vitamin D, 2,753  
5 IU; vitamin E, 55 IU; riboflavin, 9.9 mg; vitamin K, 4.41 mg; vitamin B 12, 0.06 mg; choline, 495 mg;  
6 pyridoxine, 1.65 mg; folic acid, 1.65 mg; thiamine, 1.01 mg.

7 **Table S2.** The number of reads for 16S rRNA sequencing

| Groups | Raw Reads | Clean Reads | Effective Reads |
|--------|-----------|-------------|-----------------|
| NG1    | 79966     | 78830       | 75125           |
| NG2    | 79962     | 78947       | 72641           |
| NG3    | 80189     | 78930       | 72217           |
| NG4    | 80007     | 78939       | 70402           |
| NG5    | 77639     | 76566       | 72680           |
| NG6    | 79943     | 78749       | 73614           |
| NG7    | 78562     | 78658       | 71186           |
| NG8    | 78498     | 78716       | 72432           |
| NG9    | 79568     | 78498       | 73357           |
| NG10   | 79926     | 78594       | 74552           |
| LG1    | 80064     | 78875       | 73108           |
| LG2    | 80425     | 79295       | 72648           |
| LG3    | 79710     | 78692       | 72203           |
| LG4    | 79925     | 78210       | 71143           |
| LG5    | 80132     | 76957       | 73564           |
| LG6    | 80254     | 77598       | 74120           |
| LG7    | 80551     | 79142       | 72984           |
| LG8    | 80356     | 78859       | 73049           |
| LG9    | 79963     | 77691       | 71268           |
| LG10   | 79662     | 76135       | 72254           |

8 Abbreviations represented: NG: normal blood glucose; LG: low blood glucose.

9 **Table S3.** List of primers used for RT-qPCR analysis

| Genes          | Forward primer (5' to 3' direction) | Reverse primer (5' to 3' direction) |
|----------------|-------------------------------------|-------------------------------------|
| PGC-1 $\alpha$ | ATCGCAGTCGCAACATTACA                | TTGGTTGGCTTTATGAGGAGG               |
| GCN5           | GTCTTCTGTGCCGTCACCTCAA              | GCTCTTGGGCACCTTGATGTCT              |
| PEPCK          | ATGCCTCCTCAGCTGCATAATGGTC           | CTTTCGATCCTGGCCACATC                |
| G6P            | GAGGAAGGAATGAACATTCT                | TACGGGCGTTGTCCAAACAG                |
| $\beta$ -actin | CGTTGGCTGGTTGAGAATC                 | CGGCAAGACAGAAATGACAA                |

- 10 Abbreviations represented: PGC-1 $\alpha$ , peroxisome proliferative activated receptor-g co-activator 1; GCN5,  
11 general control non-repressed protein 5; PEPCK, phosphoenolpyruvate carboxykinase; G6P, glucose-6-  
12 phosphatase.

13 **Table S4.** Primer sequences

| Target bacteria              | Source | Identifier |
|------------------------------|--------|------------|
| Lactobacillus                | ATCC   | 1578       |
| Clostridium_sensu_stricto_1  | ATCC   | 1485       |
| Clostridium_sensu_stricto_3  | ATCC   | 1485       |
| Faecalibacterium             | ATCC   | 216851     |
| Parabacteroides              | ATCC   | 375288     |
| [Eubacterium]_hallii_group   | ATCC   | 1730       |
| Bifidobacteriaceae           | ATCC   | 31953      |
| Lachnospiraceae_AC2044_group | ATCC   | 186803     |
| Streptococcaceae             | ATCC   | 1300       |

14 **Table S5.** Name, type, dilution, and source of primary antibodies

| Antibody                    | Isotype             | Dilution | Source                           |
|-----------------------------|---------------------|----------|----------------------------------|
| PGC-1 $\alpha$              | Rabbit              | 1:1000   | Abcam (Cambridge, MA, USA)       |
| GCN5                        | Rabbit              | 1:1000   | Abcam (Cambridge, MA, USA)       |
| p-GCN5                      | Rabbit              | 1:1000   | Abcam (Cambridge, MA, USA)       |
| PEPCK                       | Rabbit              | 1:1000   | Abcam (Cambridge, MA, USA)       |
| G6P                         | Rabbit              | 1:1000   | Abcam (Cambridge, MA, USA)       |
| $\beta$ -actin              | Rabbit              | 1:2500   | Abcam (Cambridge, MA, USA)       |
| Secondary Antibody          |                     |          |                                  |
| HRP<br>labelled<br>Antibody | Goat anti<br>rabbit | 1:10,000 | Santa Cruz (Santa Cruz, CA, USA) |

15 Abbreviations represented: PGC-1 $\alpha$ , peroxisome proliferative activated receptor-g co-activator 1;

16 GCN5, general control non-repressed protein 5; p-GCN5: phosphorylation of general control non-

17 repressed protein 5; PEPCK, phosphoenolpyruvate carboxykinase; G6P, glucose-6-phosphatase.

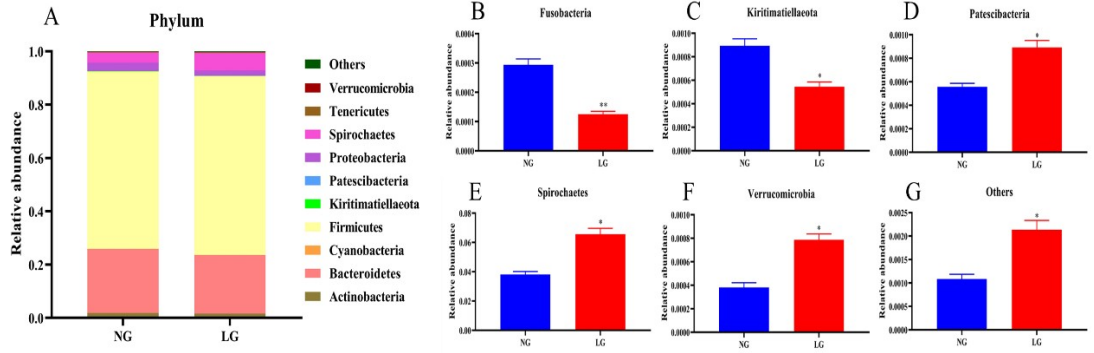

18

19 **Fig S1.** Low fasting blood glucose levels shaped colonic microbiota at the phylum level in late-pregnancy

20 sows. Relative abundance of the top 10 genera in each group (A) and the significant relative abundance

21 of microbiota in each group (B-G). Data are means of 10 sows per treatment, \*:  $P < 0.05$ , \*\*:  $P < 0.01$ .

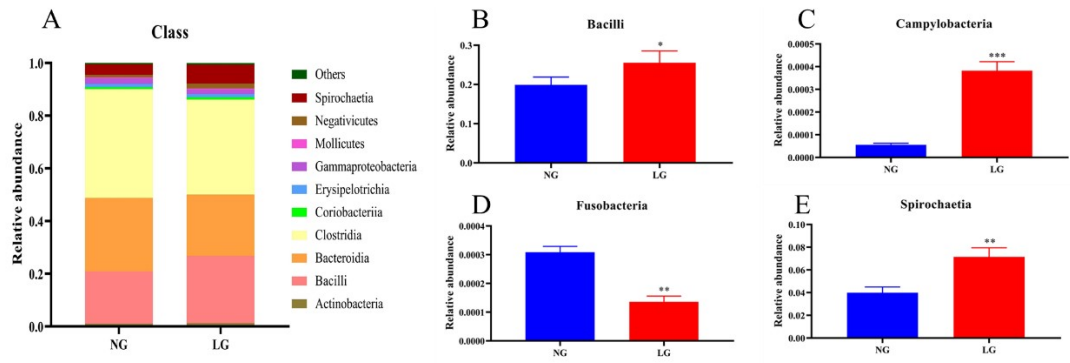

22

23 **Fig S2.** Low fasting blood glucose levels shaped colonic microbiota at the class level in late-pregnancy  
 24 sows. Relative abundance of the top 10 genera in each group (A) and the significant relative abundance  
 25 of microbiota in each group (B-E). Data are means of 10 sows per treatment, \*:  $P < 0.05$ , \*\*:  $P < 0.01$ , \*\*\*:  
 26  $P < 0.001$ .

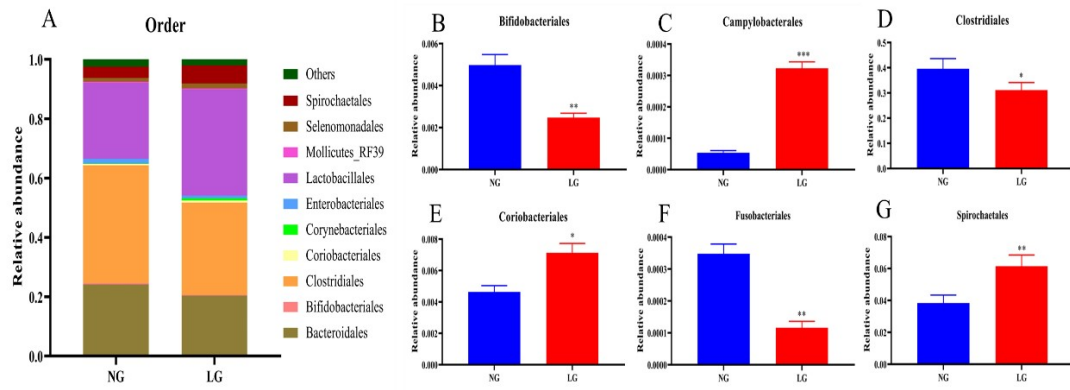

27

28 **Fig S3.** Low fasting blood glucose levels shaped colonic microbiota at the order level in late-pregnancy  
 29 sows. Relative abundance of the top 10 genera in each group (A) and the significant relative abundance  
 30 of microbiota in each group (B-G). Data are means of 10 sows per treatment, \*:  $P < 0.05$ , \*\*:  $P < 0.01$ , \*\*\*:  
 31  $P < 0.001$ .



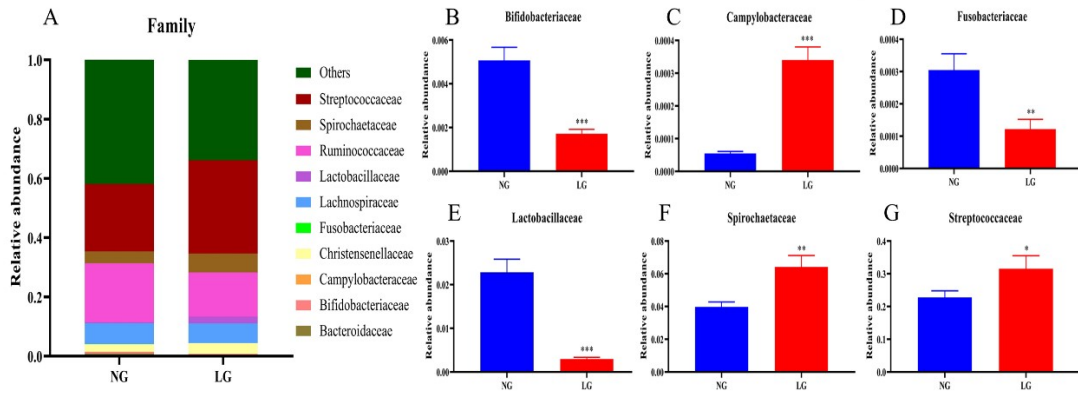

32

33 **Fig S4.** Low fasting blood glucose levels shaped colonic microbiota at the family level in late-pregnancy  
 34 sows. Relative abundance of the top 10 genera in each group (A) and the significant relative abundance  
 35 of microbiota in each group (B-G). Data are means of 10 sows per treatment, \*:  $P < 0.05$ , \*\*:  $P < 0.01$ , \*\*\*:  
 36  $P < 0.001$ .

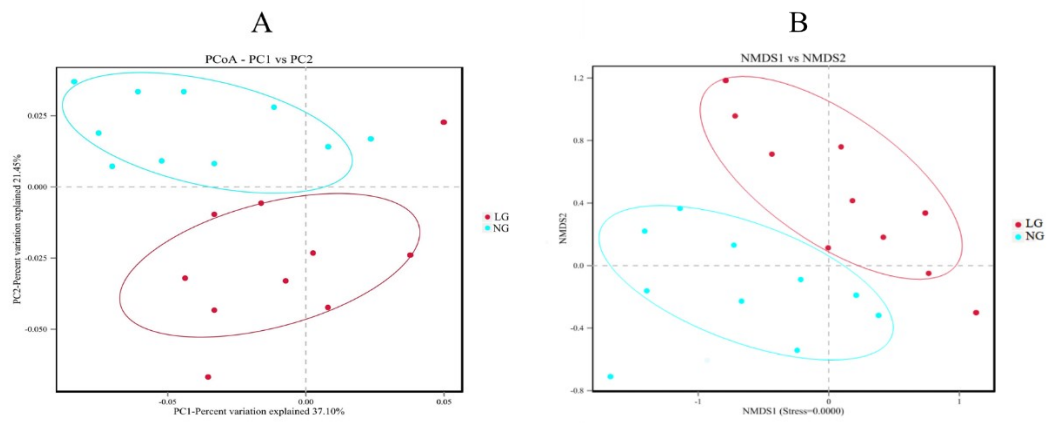

37

38 **Fig S5.** Principal coordinates analysis of beta-diversity analysis based on Bray Curtis distances of 86  
 39 genera differentially enriched in late-pregnancy sows. A: PCoA; B: NMDS analysis. Data are means of  
 40 10 sows per treatment.
